# Supplementary material
Source: PubMed Central journal article supplement (PMC5612100)
Supplement: 10.1074_M117.801548_jbc.M117.801548-1.pdf [file 10.1074_M117.801548_jbc.M117.801548-1.pdf]

### *Supplemental Data*

Unraveling the interactions of the physiological reductant flavodoxin with the different conformations of the Fe protein in the nitrogenase cycle

**Natasha Pence, Monika Tokmina-Lukaszewska, Zhi-Yong Yang, Rhesa N. Ledbetter, Lance C. Seefeldt, Brian Bothner, John W. Peters**

Supplemental Data includes:

Table S1. Peptides observed to appear and disappear in time-resolved limited proteolysis experiments.

Table S2. Peptides observed to appear and disappear in chemical cross-linking experiments.

Figure S1. Representative MALDI-TOF mass spectra for digestion of the Fe protein.

Figure S2. Representative MALDI-TOF mass spectra for digestion of Fld.

**Table S1.** Peptides observed to appear and disappear in time-resolved limited proteolysis experiments. **Peptides** that appear in response to the different nucleotide conditions and/or complex formation are highlighted in bold. Residues highlighted in gray represent amino acids modifications: carbamidomethyl (Cys) and oxidation (Met), # peptides identified by MALDI-TOF. The amino acid sequences for the Fe protein and flavodoxin are provided for reference.

| Time-resolved limited proteolysis experiments: Nitrogenase Fe protein                                                                                                                                                                                                                                                                                           |                |               |                      |
|-----------------------------------------------------------------------------------------------------------------------------------------------------------------------------------------------------------------------------------------------------------------------------------------------------------------------------------------------------------------|----------------|---------------|----------------------|
| Nitrogenase Fe protein amino acid sequence:<br>AMRQCAIYGKGGIGKSTTTQNLVAALAEMGKKVMIVGCDPKADSTRILILHSKAQNTIME<br>MAAEAGTVEDLELEDVVKAGYGGVKCVESGGPEPGVGCAGRGVITAINFLEEEGAYE<br>DDLDFVFDVLDGDDVCGGFAMPIRENKAQEIYIVCSGEMMAMYAANNISKGIVKYANS<br>GSVRLGGLICNSRNTDREDELIILANKLGTQMIHFVPRDNNVQRAEIRRMVIEYDPKA<br>KQADEYRALARKVVDNKLIVIPNPITMDELEELLMEFGIMEVEDESIVGKTAEEV |                |               |                      |
| Peptide sequence                                                                                                                                                                                                                                                                                                                                                | Residue number | Expected mass | m/z                  |
| AMRQCAIYGKGGIGK                                                                                                                                                                                                                                                                                                                                                 | <b>1-15</b>    | 1551.80       | 1551.58 <sup>#</sup> |
| GGIGKSTTTQNLVAALAEMGK                                                                                                                                                                                                                                                                                                                                           | 11-31          | 2046.08       | 683.37               |
| GGIGKSTTTQNLVAALAEMGKK                                                                                                                                                                                                                                                                                                                                          | 11-32          | 2174.17       | 726.06               |
| GGIGKSTTTQNLVAALAEMGKK                                                                                                                                                                                                                                                                                                                                          |                | 2190.16       | 731.40               |
| STTTQNLVAALAEMGK                                                                                                                                                                                                                                                                                                                                                | 16-31          | 1633.83       | 817.92               |
| STTTQNLVAALAEMGK                                                                                                                                                                                                                                                                                                                                                |                | 1649.82       | 825.93               |
| STTTQNLVAALAEMGKK                                                                                                                                                                                                                                                                                                                                               | <b>16-32</b>   | 1761.93       | 1761.77 <sup>#</sup> |
|                                                                                                                                                                                                                                                                                                                                                                 |                |               | 881.97               |
| STTTQNLVAALAEMGKK                                                                                                                                                                                                                                                                                                                                               |                | 1777.92       | 889.98               |
| VMIVGCDPKADSTR                                                                                                                                                                                                                                                                                                                                                  | <b>33-46</b>   | 1490.72       | 1490.50 <sup>#</sup> |
| VMIVGCDPKADSTR                                                                                                                                                                                                                                                                                                                                                  |                | 1547.74       | 773.87               |
| VMIVGCDPKADSTR                                                                                                                                                                                                                                                                                                                                                  |                | 1563.73       | 522.58               |
| VMIVGCDPKADSTRILILHSK                                                                                                                                                                                                                                                                                                                                           | 33-52          | 2182.16       | 2182.85 <sup>#</sup> |
| ADSTRILILHSK                                                                                                                                                                                                                                                                                                                                                    | 42-52          | 1239.69       | 620.85               |
| AQNTIMEMAAEAGTVEDLELEDVVK                                                                                                                                                                                                                                                                                                                                       | <b>53-77</b>   | 2719.29       | 2719.29 <sup>#</sup> |
|                                                                                                                                                                                                                                                                                                                                                                 |                |               | 1361.17              |
| AQNTIMEMAAEAGTVEDLELEDVVK                                                                                                                                                                                                                                                                                                                                       |                | 2735.28       | 1369.17              |
| AQNTIMEMAAEAGTVEDLELEDVVK                                                                                                                                                                                                                                                                                                                                       |                | 2751.27       | 1377.15              |
| AQNTIMEMAAEAGTVEDLELEDVVKAGYGGVK                                                                                                                                                                                                                                                                                                                                | <b>53-84</b>   | 3351.62       | 3351.73 <sup>#</sup> |
| AGYGGVKCVESGGPEPGVGCAGR                                                                                                                                                                                                                                                                                                                                         | 78-100         | 2105.96       | 2105.63 <sup>#</sup> |
| CVESGGPEPGVGCAGR                                                                                                                                                                                                                                                                                                                                                | 85-100         | 1473.63       | 1473.34 <sup>#</sup> |
| GIVKYANSGSVR                                                                                                                                                                                                                                                                                                                                                    | 167-178        | 1249.68       | 1249.40 <sup>#</sup> |
|                                                                                                                                                                                                                                                                                                                                                                 |                |               | 625.85               |
| YANSGSVR                                                                                                                                                                                                                                                                                                                                                        | 171-178        | 852.41        | 852.17 <sup>#</sup>  |
|                                                                                                                                                                                                                                                                                                                                                                 |                |               | 428.23               |
| LGGLICNSR                                                                                                                                                                                                                                                                                                                                                       | 179-187        | 931.49        | 931.24 <sup>#</sup>  |
| NTDREDELIILANK                                                                                                                                                                                                                                                                                                                                                  | 188-202        | 1713.89       | 1713.56 <sup>#</sup> |
|                                                                                                                                                                                                                                                                                                                                                                 |                |               | 857.96               |
| NTDREDELIILANKLGTQMIHFVPR                                                                                                                                                                                                                                                                                                                                       | 188-213        | 2993.58       | 2993.53 <sup>#</sup> |
| LGTQMIHFVPR                                                                                                                                                                                                                                                                                                                                                     | 203-213        | 1297.70       | 1297.49 <sup>#</sup> |
|                                                                                                                                                                                                                                                                                                                                                                 |                |               | 649.86               |
| LGTQMIHFVPR                                                                                                                                                                                                                                                                                                                                                     |                | 1313.69       | 657.85               |
| LGTQMIHFVPRDNNVQRAEIRRMVIEYDPKA                                                                                                                                                                                                                                                                                                                                 | 203-219        | 2009.06       | 2009.72 <sup>#</sup> |

|                                                                                                                                                                                                   |                |               |                     |
|---------------------------------------------------------------------------------------------------------------------------------------------------------------------------------------------------|----------------|---------------|---------------------|
| LGTQMIHFVPRDNVVQR                                                                                                                                                                                 |                | 2025.05       | 1006.05<br>676.36   |
| MIHFVPR                                                                                                                                                                                           | 207-213        | 914.47        | 458.24              |
| DNVVQRAEIR                                                                                                                                                                                        | 214-223        | 1198.64       | 600.32              |
| DNVVQRAEIRR                                                                                                                                                                                       | 214-224        | 1354.74       | 1354.44#<br>452.58  |
| RMTVIEYDPK                                                                                                                                                                                        | 224-233        | 1250.63       | 626.33              |
| RMTVIEYDPK                                                                                                                                                                                        |                | 1266.62       | 634.32              |
| RMTVIEYDPKAK                                                                                                                                                                                      | 224-235        | 1449.76       | 1449.46#<br>725.89  |
| RMTVIEYDPKAK                                                                                                                                                                                      |                | 1465.75       | 489.59              |
| RMTVIEYDPKAKQADEYR                                                                                                                                                                                | 224-241        | 2212.09       | 2212.81#            |
| RMTVIEYDPKAKQADEYRALAR                                                                                                                                                                            | 224-245        | 2623.35       | 2623.10#            |
| MTVIEYDPK                                                                                                                                                                                         | 225-233        | 1094.53       | 548.27              |
| MTVIEYDPK                                                                                                                                                                                         |                | 1110.52       | 556.27              |
| MTVIEYDPKAK                                                                                                                                                                                       | 225-235        | 1293.66       | 1293.37#<br>647.84  |
| MTVIEYDPKAK                                                                                                                                                                                       |                | 1309.65       | 655.84              |
| MTVIEYDPKAKQADEYR                                                                                                                                                                                 | 225-241        | 2055.99       | 2055.73#<br>1029.51 |
| MTVIEYDPKAKQADEYR                                                                                                                                                                                 |                | 2071.98       | 1037.50             |
| MTVIEYDPKAKQADEYRALAR                                                                                                                                                                             | 225-245        | 2467.25       | 2467.97#            |
| AKQADEYR                                                                                                                                                                                          | 234-241        | 979.47        | 979.22#             |
| AKQADEYRALAR                                                                                                                                                                                      | 234-245        | 1390.73       | 696.37              |
| QADEYRALAR                                                                                                                                                                                        | 236-245        | 1191.60       | 1191.33#<br>596.80  |
| QADEYRALARK                                                                                                                                                                                       |                | 236-246       | 1319.69             |
| Time-resolved limited proteolysis experiments: Flavodoxin                                                                                                                                         |                |               |                     |
| Flavodoxin amino acid sequence:                                                                                                                                                                   |                |               |                     |
| AKIGLFFGSNTGKTRKVAKSIKKRFDDDETMSDALNVNRVSAEDFAQYQFLILGTPTLGE<br>GELPGLSSDCENESWEEFLPKIEGLDFSGKTVALFGLGDQVGYPENYLDALGELYSFF<br>KDRGAKIVGSWSTDGYEFESSEAVVDGKVFVGLALDLDNQSGKTDERVAAWLAQIAPE<br>FGLSL |                |               |                     |
| Peptide sequence                                                                                                                                                                                  | Residue number | Expected mass | m/z                 |
| AKIGLFFGSNTGK                                                                                                                                                                                     | 1-13           | 1338.73       | 1338.44#            |
| AKIGLFFGSNTGKTR                                                                                                                                                                                   | <b>1-15</b>    | 1595.88       | 1595.55#            |
| AKIGLFFGSNTGKTRK                                                                                                                                                                                  | 1-16           | 1723.97       | 1723.65#            |
| AKIGLFFGSNTGKTRKVAK                                                                                                                                                                               | 1-19           | 2022.17       | 2022.66#            |
| IGLFFGSNTGK                                                                                                                                                                                       | <b>3-13</b>    | 1139.60       | 570.80              |
| KRFDDDETMSDALNVNR                                                                                                                                                                                 | <b>23-38</b>   | 1925.89       | 642.97              |
| RFDDETMSDALNVNR                                                                                                                                                                                   | 24-38          | 1781.80       | 1781.53#            |
| RFDDETMSDALNVNR                                                                                                                                                                                   |                | 1797.79       | 899.91              |
| FDDDETMSDALNVNR                                                                                                                                                                                   | 25-38          | 1625.70       | 1625.42#<br>813.86  |
| FDDDETMSDALNVNR                                                                                                                                                                                   |                | 1641.69       | 821.86              |
| IEGLDFSGK                                                                                                                                                                                         | 81-89          | 964.49        | 964.27#             |

|                                 |                |         |                                |
|---------------------------------|----------------|---------|--------------------------------|
|                                 |                |         | 483.25                         |
| TVALFGLGDQVGYPENYLDALGELYSFFKDR | <b>90-120</b>  | 3496.72 | 3496.67 <sup>#</sup>           |
| IVGSWSTDGYEFESSEAVVDGK          | 124-145        | 2361.06 | 1182.05                        |
| FVGLALDLNQSGK                   | 146-159        | 1475.76 | 738.89                         |
| FVGLALDLNQSGKTDER               | <b>146-163</b> | 1976.98 | 1976.70 <sup>#</sup><br>660.33 |

**Table S2.** Peptides observed to appear and disappear in cross-linking experiments. **Peptides** that disappear due to cross-linking in response to the different nucleotide conditions and/or complex formation are highlighted in bold. Residues highlighted in gray represent amino acid modifications: carbamidomethyl (Cys) and oxidation (Met), \*single oxidation of multiple methionine residues. The amino acid sequences for the Fe protein and flavodoxin are provided for reference.

| Cross-linking experiments: Nitrogenase Fe protein                                                                                                                                                                                                                                                                                                               |                |               |          |
|-----------------------------------------------------------------------------------------------------------------------------------------------------------------------------------------------------------------------------------------------------------------------------------------------------------------------------------------------------------------|----------------|---------------|----------|
| Nitrogenase Fe protein amino acid sequence:<br>AMRQCAIYGKGGIGKSTTTQNLVAALAEMGKKVMIVGCDPKADSTRILILHSKAQNTIMEMAA<br>EAGTVEDELELEDVLRKAGYGGVCKVESGGPEPGVGCAGRGVITAINFLEEEGAYEDDLDFVY<br>DVLGDVVCVGGFAMPIRENKAQEIVCSGEMMAMYAANNISKGIVKYANSGSVRLGGLICNS<br>RNTDREDELIALANKLGTQMIHFVPRDNVVQRAEIRRMTVIEYDPKAKQADEYRALARKVVD<br>NKLLVIPNPITMDELEELLMEFGIMEVEDESIVGKTAEV |                |               |          |
| Peptide sequence                                                                                                                                                                                                                                                                                                                                                | Residue number | Expected mass | m/z      |
| QCAIYGK                                                                                                                                                                                                                                                                                                                                                         | <b>4-10</b>    | 838.40        | 420.21   |
| GGIGKSTTTQNLVAALAEMGKK                                                                                                                                                                                                                                                                                                                                          | <b>11-32</b>   | 2190.16       | 731.40   |
| STTTQNLVAALAEMGKK                                                                                                                                                                                                                                                                                                                                               | 16-32          | 1761.93       | 882.48   |
| STTTQNLVAALAEMGKK                                                                                                                                                                                                                                                                                                                                               |                | 1777.92       | 889.98   |
| STTTQNLVAALAEMGK                                                                                                                                                                                                                                                                                                                                                | 16-31          | 1633.83       | 817.93   |
| STTTQNLVAALAEMGK                                                                                                                                                                                                                                                                                                                                                |                | 1649.82       | 826.43   |
| KVMIVGCDPKADSTR                                                                                                                                                                                                                                                                                                                                                 | <b>32-46</b>   | 1618.82       | 811.42   |
| KVMIVGCDPK                                                                                                                                                                                                                                                                                                                                                      | 32-41          | 1145.59       | 573.81   |
| KVMIVGCDPK                                                                                                                                                                                                                                                                                                                                                      |                | 1161.58       | 581.80   |
| VMIVGCDPK                                                                                                                                                                                                                                                                                                                                                       | 33-41          | 1017.50       | 509.76   |
| VMIVGCDPK                                                                                                                                                                                                                                                                                                                                                       |                | 1033.49       | 517.76   |
| LILHSK                                                                                                                                                                                                                                                                                                                                                          | 47-52          | 709.45        | 355.73   |
| AQNTIMEMAAEAGTVEDELELEDVLR                                                                                                                                                                                                                                                                                                                                      | <b>53-77</b>   | 2719.29       | 1361.17  |
| AQNTIMEMAAEAGTVEDELELEDVLR                                                                                                                                                                                                                                                                                                                                      |                | 2735.28       | 1369.17  |
| AQNTIMEMAAEAGTVEDELELEDVLR                                                                                                                                                                                                                                                                                                                                      |                | 2751.27       | 1377.17  |
| AGYGGVCKVESGGPEPGVGCAGR                                                                                                                                                                                                                                                                                                                                         | <b>78-100</b>  | 2220.00       | 741.35   |
| CVESGGPEPGVGCAGR                                                                                                                                                                                                                                                                                                                                                | <b>85-100</b>  | 1587.67       | 794.86   |
| DVLGDVVCVGGFAMPIR                                                                                                                                                                                                                                                                                                                                               | <b>125-140</b> | 1704.83       | 853.43   |
| DVLGDVVCVGGFAMPIR                                                                                                                                                                                                                                                                                                                                               |                | 1720.82       | 861.43   |
| DVLGDVVCVGGFAMPIRENK                                                                                                                                                                                                                                                                                                                                            | 125-143        | 2076.01       | 1039.51  |
| DVLGDVVCVGGFAMPIRENK                                                                                                                                                                                                                                                                                                                                            |                | 2092.00       | 1047.52  |
| AQEIVCSGEMMAMYAANNISKGIVK                                                                                                                                                                                                                                                                                                                                       | <b>144-170</b> | 2990.44       | 998.50   |
| AQEIVCSGEMMAMYAANNISK                                                                                                                                                                                                                                                                                                                                           | 144-166        | 2593.17       | 1298.10  |
| AQEIVCSGEMMAMYAANNISK                                                                                                                                                                                                                                                                                                                                           |                | 2609.16       | 1306.11* |
| AQEIVCSGEMMAMYAANNISK                                                                                                                                                                                                                                                                                                                                           |                | 2641.14       | 1322.09  |
| AQEIVCSGEMMAMY                                                                                                                                                                                                                                                                                                                                                  | 144-159        | 1894.80       | 948.91   |
| AQEIVCSGEMMAMY                                                                                                                                                                                                                                                                                                                                                  |                | 1942.77       | 972.90   |
| IVCSGEMMAMYAANNISK                                                                                                                                                                                                                                                                                                                                              | 149-166        | 1988.88       | 995.95   |
| IVCSGEMMAMYAANNISK                                                                                                                                                                                                                                                                                                                                              |                | 2020.86       | 1011.95* |
| IVCSGEMMAMYAANNISK                                                                                                                                                                                                                                                                                                                                              |                | 2036.85       | 1019.94  |
| GIVKYANSGSVR                                                                                                                                                                                                                                                                                                                                                    | <b>167-178</b> | 1249.68       | 625.85   |
| YANSGSVR                                                                                                                                                                                                                                                                                                                                                        | 171-178        | 852.41        | 427.21   |
| LGGLICNSR                                                                                                                                                                                                                                                                                                                                                       | 179-187        | 988.51        | 495.27   |

| NTDREDELIILANK                                                                                                                                                                                                                   | 188-202        | 1713.89       | 857.96  |
|----------------------------------------------------------------------------------------------------------------------------------------------------------------------------------------------------------------------------------|----------------|---------------|---------|
| NTDREDELIILANKLGTQMIHFVPR                                                                                                                                                                                                        | 188-213        | 2993.58       | 749.66  |
| NTDREDELIILANKLGTQMIHFVPR                                                                                                                                                                                                        |                | 3009.57       | 753.91  |
| EDELIILANK                                                                                                                                                                                                                       | 192-202        | 1227.67       | 614.85  |
| LGTQMIHFVPR                                                                                                                                                                                                                      | 203-213        | 1297.70       | 649.85  |
| LGTQMIHFVPR                                                                                                                                                                                                                      |                | 1313.69       | 657.86  |
| RMTVIEYDPK                                                                                                                                                                                                                       | 224-233        | 1250.63       | 626.33  |
| RMTVIEYDPK                                                                                                                                                                                                                       |                | 1266.62       | 634.33  |
| MTVIEYDPK                                                                                                                                                                                                                        | 225-233        | 1094.53       | 548.28  |
| MTVIEYDPK                                                                                                                                                                                                                        |                | 1110.52       | 556.27  |
| LLVIPNPITMDELEELLMEF                                                                                                                                                                                                             | 252-271        | 2358.21       | 1180.63 |
| LLVIPNPITMDELEELLMEF                                                                                                                                                                                                             |                | 2390.19       | 1196.61 |
| GIMEVEDESIVGK                                                                                                                                                                                                                    | 272-284        | 1404.68       | 703.35  |
| GIMEVEDESIVGK                                                                                                                                                                                                                    |                | 1420.67       | 711.35  |
| Cross-linking experiments: Flavodoxin                                                                                                                                                                                            |                |               |         |
| Flavodoxin amino acid sequence:<br>AKIGLFFGSNTGKTRKVAKSIKKRFDDDETMSDALNVNRVSAEDFAQYQFLILGTPTLGEGELP<br>GLSSDCENESWEEFLPKIEGLDFSGKTVALFGLGDQVGYPENYLDALGELYSFFKDRGAKIV<br>GSWSTDGYEFESSEAVVDGK FVGLALDLDNQSGKTDERVAAWLAQIAPEFGLSL |                |               |         |
| Peptide sequence                                                                                                                                                                                                                 | Residue number | Expected mass | m/z     |
| AKIGLFFGSNTGK                                                                                                                                                                                                                    | 1-13           | 1338.73       | 670.38  |
| IGLFFGSNTGK                                                                                                                                                                                                                      | 3-13           | 1139.60       | 570.81  |
| KRFDDDETMSDALNVNR                                                                                                                                                                                                                | 23-38          | 1925.89       | 642.98  |
| RFDDDETMSDALNVNR                                                                                                                                                                                                                 | 24-38          | 1781.80       | 891.91  |
| RFDDDETMSDALNVNR                                                                                                                                                                                                                 |                | 1797.79       | 900.41  |
| FDDDETMSDALNVNR                                                                                                                                                                                                                  | 25-38          | 1625.70       | 813.86  |
| FDDDETMSDALNVNR                                                                                                                                                                                                                  |                | 1641.69       | 821.86  |
| RFDDDETMSDAL                                                                                                                                                                                                                     | 24-34          | 1314.53       | 658.28  |
| VSAEDFAQYQFL                                                                                                                                                                                                                     | 39-50          | 1416.66       | 709.34  |
| ILGTPTLGEGELPGLSSDCENESWEEFLPK                                                                                                                                                                                                   | 51-80          | 3303.55       | 1653.30 |
| GTPTLGEGELPGLSSDCENESWEEFLPK                                                                                                                                                                                                     | 53-80          | 3077.38       | 1540.21 |
| IEGLDFSGK                                                                                                                                                                                                                        | 81-89          | 964.49        | 483.25  |
| TVALFGLGDQVGYPENYLDALGELY                                                                                                                                                                                                        | <b>90-114</b>  | 2716.33       | 1359.68 |
| GDQVGYPENYLDALGELYSFFK                                                                                                                                                                                                           | <b>97-118</b>  | 2524.18       | 1348.67 |
| SFFKDR                                                                                                                                                                                                                           | <b>115-120</b> | 798.40        | 400.21  |
| IVGSWSTDGYEFESSEAVVDGK                                                                                                                                                                                                           | 124-145        | 2361.06       | 1182.05 |
| STDGYEFESSEAVVDGK                                                                                                                                                                                                                | 129-145        | 1818.78       | 910.40  |
| EFESSEAVVDGK                                                                                                                                                                                                                     | 134-145        | 1295.59       | 648.81  |
| FVGLALDLDNQSGKTDER                                                                                                                                                                                                               | <b>146-163</b> | 1976.98       | 990.00  |
| FVGLALDLDNQSGK                                                                                                                                                                                                                   | <b>146-159</b> | 1475.76       | 739.90  |
| VGLALDLDNQSGK                                                                                                                                                                                                                    | <b>147-159</b> | 1328.69       | 665.36  |
| ALDLDNQSGK                                                                                                                                                                                                                       | <b>150-159</b> | 1059.52       | 530.77  |
| VAAWLAQIAPEFGLSL                                                                                                                                                                                                                 | 164-179        | 1684.92       | 843.47  |

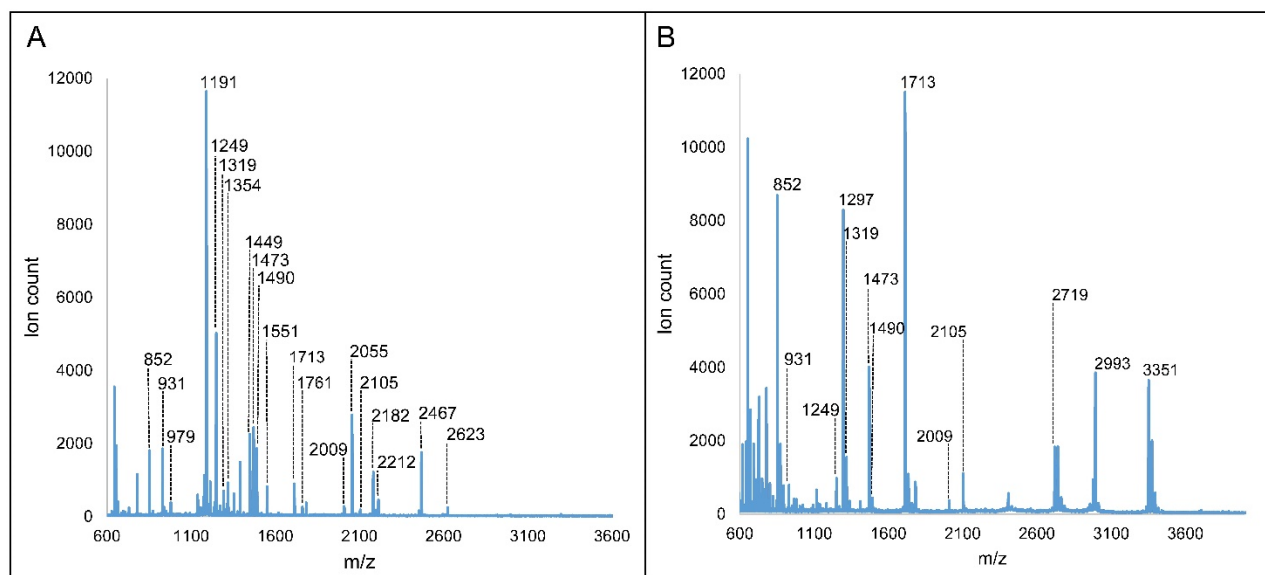

**Figure S1.** Representative MALDI-TOF mass spectra for digestion of the Fe protein. *A*, representative MALDI-TOF spectrum of Ion count vs  $m/z$  for the Fe protein after 10 minutes digestion with labelled ions: 852 (YANSGSVR), 931 (LGGLICNSR), 979 (AKQADEYR), 1191 (QADEYRALAR), 1249 (GIVKYANSGSVR), 1319 (QADEYRALARK), 1354 (DNVVQRAEIRR), 1449 (RMTVIEYDPKAK), 1473 (CVESGGPEPGVGCAGR), 1490 (VMIVGCDPKADSTR), 1551 (MRQCAIYGKGGIGK), 1713 (NTDREDELIHALANK), 1761 (STTTQNLVAALAEMGKK), 2009 (LGTQMIHFVPRDNNVQR), 2055 (MTVIEYDPKAKQADEYR), 2105 (AGYGGVKCVESGGPEPGVGCAGR), 2182 (VMIVGCDPKADSTRILILHSK), 2212 (RMTVIEYDPKAKQADEYR), 2467 (MTVIEYDPKAKQADEYRALAR), 2623 (RMTVIEYDPKAKQADEYRALAR). *B*, representative MALDI-TOF spectrum of Ion count vs  $m/z$  for the Fe protein after 240 minutes digestion with labelled ions: 852 (YANSGSVR), 931 (LGGLICNSR), 1249 (GIVKYANSGSVR), 1297 (IGTQMIHFVPR), 1319 (QADEYRALARK), 1473 (CVESGGPEPGVGCAGR), 1490 (VMIVGCDPKADSTR), 1713 (NTDREDELIHALANK), 2009 (LGTQMIHFVPRDNNVQR), 2105 (AGYGGVKCVESGGPEPGVGCAGR), 2719 (AQNTIMEMAAEAGTVEDELELEDVVK), 2993 (NTDREDELIHALANKLGTQMIHFVPR), 3351 (AQNTIMEMAAEAGTVEDELELEDVVKAGYGGVK).

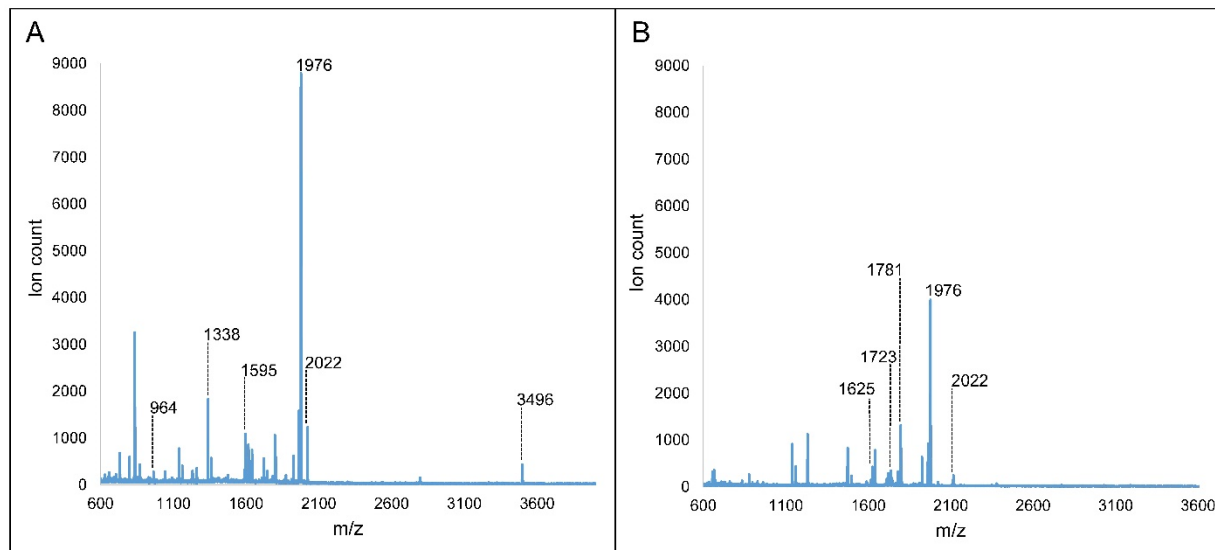

**Figure S2.** Representative MALDI-TOF mass spectra for digestion of Fld. *A*, representative MALDI-TOF spectrum of Ion count vs  $m/z$  for Fld after 20 minutes digestion with labelled ions: 964 (IEGLDFSGK), 1338 (AKIGLFFGSNTGK), 1595 (AKIGLFFGSNTGKTR), 1976 (FVGLALDLNQSQTDER), 2022 (AKIGLFFGSNTGKTRKVAK), 3496 (TVALFGLGDQVGYPENYLDALGELYSFFKDR). *B*, representative MALDI-TOF spectrum of Ion count vs  $m/z$  for Fld after 240 minutes digestion with labelled ions: 1625 (FDDTMSDALNVNR), 1723 (AKIGLFFGSNTGKTRK), 1781 (FDDTMSDALNVNR), 1976 (FVGLALDLNQSQTDER) and 2022 (AKIGLFFGSNTGKTRKVAK).
